# Supplementary material for: Analysis of SARS-CoV-2 Genomes from West Java, Indonesia
Source: MDPI journal article supplement (doi:10.3390/v13102097), 2021-10-18
Supplement: s1 [file s1]

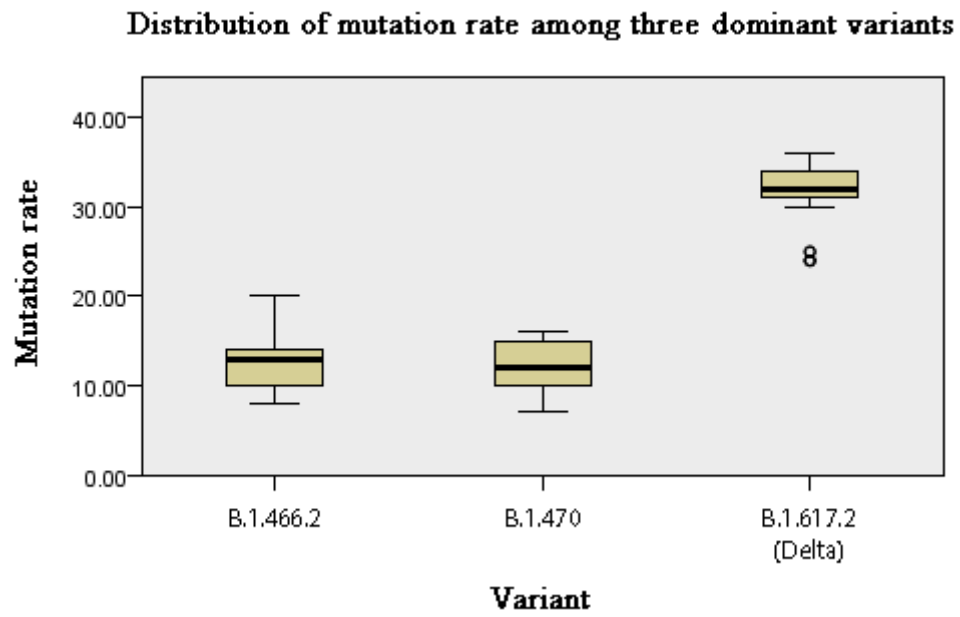

**Supplementary Figure S1. Kruskal–Wallis test for the significance of mutation rate of three dominant SARS-CoV-2 variants.** Mutation rate of the B.1.617.2 Delta variant is significantly higher than the other two dominant variants (tested using the Kruskal–Wallis test, with  $p < 0.05$ ).

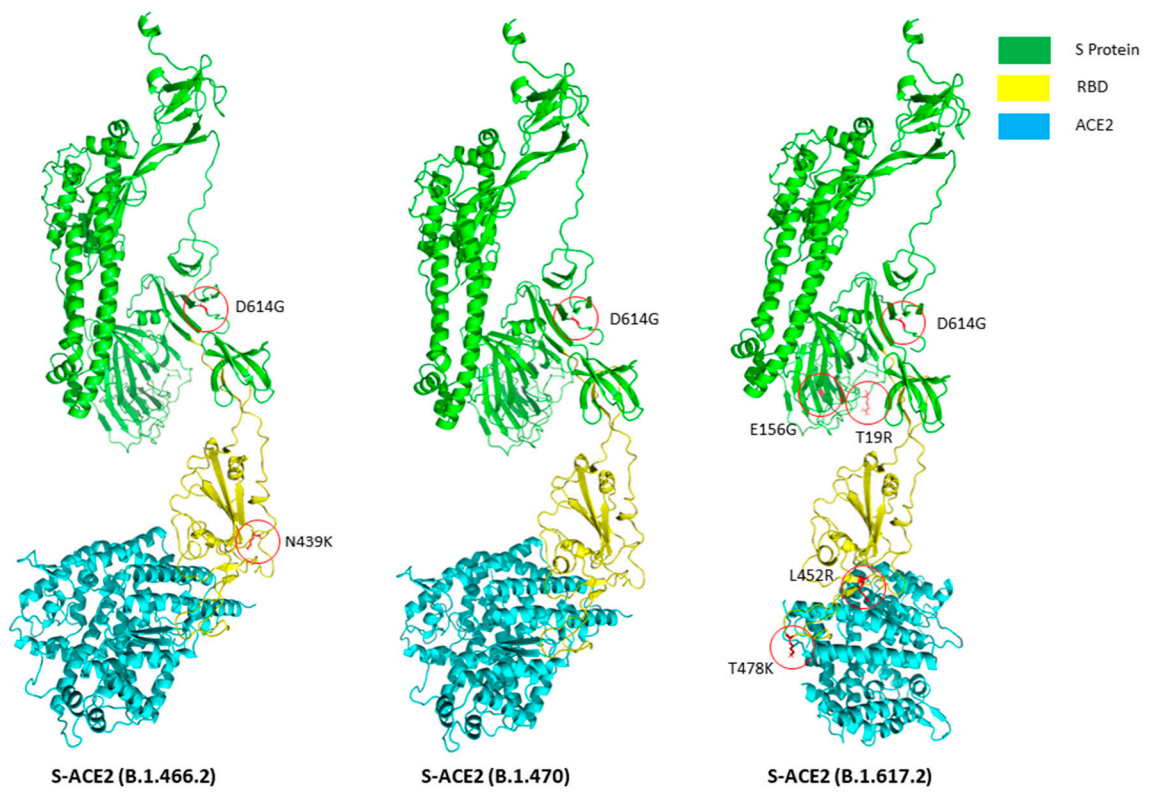

Supplementary Figure S2. Visualization of interaction between spike protein of B.1.466.2, B.1.470, and B.1.617.2 variant with ACE2 receptor along with position of mutated residues show in red circles.

**Supplementary Table S1 List of SARS-CoV-2 genome sequences from West Java Health Laboratory (WJHL) analyzed in this study.** Sequences retrieved from GISAID (<https://www.gisaid.org/>).

| No. | ACCESSION ID    | Sequencing technology  | Assembly method                      |
|-----|-----------------|------------------------|--------------------------------------|
| 1   | EPI_ISL_1340862 | Illumina NextSeq       | DRAGEN COVID Lineage BaseSpace       |
| 2   | EPI_ISL_1340865 | Illumina NextSeq 500   | DRAGEN COVID Lineage BaseSpace       |
| 3   | EPI_ISL_1340866 | Illumina NextSeq 500   | DRAGEN COVID Lineage BaseSpace       |
| 4   | EPI_ISL_1340867 | Illumina NextSeq 500   | DRAGEN COVID Lineage BaseSpace       |
| 5   | EPI_ISL_1341792 | Illumina NextSeq 500   | DRAGEN COVID Lineage BaseSpace       |
| 6   | EPI_ISL_1341793 | Illumina NextSeq 500   | DRAGEN COVID Lineage BaseSpace       |
| 7   | EPI_ISL_1341796 | Illumina NextSeq 500   | DRAGEN COVID Lineage BaseSpace       |
| 8   | EPI_ISL_1341797 | Illumina NextSeq 500   | DRAGEN COVID Lineage BaseSpace       |
| 9   | EPI_ISL_1341800 | Illumina NextSeq 500   | DRAGEN COVID Lineage BaseSpace       |
| 10  | EPI_ISL_1341801 | Nanopore GridION       | RAMPART                              |
| 11  | EPI_ISL_1341802 | Illumina MiSeq         | CLC Genomics Workbench               |
| 12  | EPI_ISL_1341907 | Illumina MiSeq         | CLC Genomics Workbench               |
| 13  | EPI_ISL_1343218 | Illumina MiSeq         | CLC Genomics Workbench               |
| 14  | EPI_ISL_1344587 | Illumina MiSeq         | CLC Genomics Workbench               |
| 15  | EPI_ISL_1346047 | Illumina MiSeq         | CLC Genomics Workbench               |
| 16  | EPI_ISL_1346484 | Illumina NextSeq 500   | DRAGEN COVID Lineage BaseSpace       |
| 17  | EPI_ISL_1346625 | Illumina NextSeq 500   | DRAGEN COVID Lineage BaseSpace 4212x |
| 18  | EPI_ISL_1346627 | Illumina NextSeq 500   | DRAGEN COVID Lineage BaseSpace       |
| 19  | EPI_ISL_1398267 | Illumina NextSeq 500   | DRAGEN COVID Lineage BaseSpace       |
| 20  | EPI_ISL_1398353 | Illumina NextSeq 500   | DRAGEN COVID Lineage BaseSpace       |
| 21  | EPI_ISL_1398355 | Illumina NextSeq 500   | DRAGEN COVID Lineage BaseSpace       |
| 22  | EPI_ISL_1398357 | Illumina NextSeq 500   | DRAGEN COVID Lineage BaseSpace       |
| 23  | EPI_ISL_1398359 | Illumina NextSeq 500   | Geneious Prime v.2021.1.1            |
| 24  | EPI_ISL_1398361 | Illumina NextSeq 500   | DRAGEN COVID Lineage BaseSpace       |
| 25  | EPI_ISL_1398363 | Illumina NextSeq 500   | DRAGEN COVID Lineage BaseSpace       |
| 26  | EPI_ISL_1398365 | Illumina MiSeq, Sanger | CLC Genomics Workbench 12            |
| 27  | EPI_ISL_1398367 | Illumina MiSeq, Sanger | CLC Genomics Workbench 12            |
| 28  | EPI_ISL_1398369 | Illumina MiSeq, Sanger | CLC Genomics Workbench 12            |
| 29  | EPI_ISL_1398371 | Illumina MiSeq         | BaseSpace                            |
| 30  | EPI_ISL_1398374 | Illumina MiSeq         | BaseSpace                            |
| 31  | EPI_ISL_1398375 | Illumina MiSeq         | BaseSpace                            |
| 32  | EPI_ISL_1398561 | Illumina MiSeq         | BaseSpace                            |
| 33  | EPI_ISL_1398562 | Illumina MiSeq         | BaseSpace                            |
| 34  | EPI_ISL_1398563 | Illumina MiSeq         | BaseSpace                            |
| 35  | EPI_ISL_1398565 | Illumina MiSeq         | BaseSpace                            |
| 36  | EPI_ISL_1398567 | Illumina MiSeq         | BaseSpace                            |
| 37  | EPI_ISL_1398568 | Illumina MiSeq         | BaseSpace                            |
| 38  | EPI_ISL_1398924 | Illumina MiSeq         | BaseSpace                            |

|    |                 |                      |                                 |
|----|-----------------|----------------------|---------------------------------|
| 39 | EPI_ISL_1398929 | Illumina MiSeq       | BaseSpace                       |
| 40 | EPI_ISL_1398930 | Illumina MiSeq       | CLC Genomics Workbench          |
| 41 | EPI_ISL_1398932 | Illumina MiSeq       | CLC Genomics Workbench          |
| 42 | EPI_ISL_1398934 | Illumina MiSeq       | CLC Genomics Workbench          |
| 43 | EPI_ISL_1398936 | Illumina MiSeq       | CLC Genomics Workbench          |
| 44 | EPI_ISL_1398939 | Illumina MiSeq       | CLC Genomics Workbench          |
| 45 | EPI_ISL_1398942 | Illumina MiSeq       | CLC Genomics Workbench          |
| 46 | EPI_ISL_1398955 | Illumina MiSeq       | CLC Genomics Workbench          |
| 47 | EPI_ISL_1398980 | Illumina MiSeq       | CLC Genomics Workbench          |
| 48 | EPI_ISL_1398981 | Illumina MiSeq       | CLC Genomics Workbench          |
| 49 | EPI_ISL_1398983 | Illumina MiSeq       | CLC Genomics Workbench          |
| 50 | EPI_ISL_1398984 | Illumina MiSeq       | CLC Genomics Workbench          |
| 51 | EPI_ISL_1615586 | Illumina NextSeq 550 | custom minimap2 + iVar pipeline |
| 52 | EPI_ISL_1615587 | Illumina NextSeq 550 | custom minimap2 + iVar pipeline |
| 53 | EPI_ISL_1615588 | Illumina NextSeq 550 | custom minimap2 + iVar pipeline |
| 54 | EPI_ISL_1615589 | Illumina NextSeq 550 | custom minimap2 + iVar pipeline |
| 55 | EPI_ISL_1615590 | Illumina NextSeq 550 | custom minimap2 + iVar pipeline |
| 56 | EPI_ISL_1615600 | Illumina NextSeq 550 | custom minimap2 + iVar pipeline |
| 57 | EPI_ISL_1615617 | Illumina NextSeq 550 | custom minimap2 + iVar pipeline |
| 58 | EPI_ISL_1615620 | Illumina NextSeq 550 | custom minimap2 + iVar pipeline |
| 59 | EPI_ISL_1615621 | Illumina NextSeq 550 | custom minimap2 + iVar pipeline |
| 60 | EPI_ISL_1615656 | Illumina NextSeq 550 | custom minimap2 + iVar pipeline |
| 61 | EPI_ISL_1615658 | Illumina NextSeq 550 | custom minimap2 + iVar pipeline |
| 62 | EPI_ISL_1615660 | Illumina NextSeq 550 | custom minimap2 + iVar pipeline |
| 63 | EPI_ISL_1633339 | illumina Miseq       | CLC Genomics Workbench          |
| 64 | EPI_ISL_1634442 | illumina Miseq       | CLC Genomics Workbench          |
| 65 | EPI_ISL_1634465 | illumina Miseq       | CLC Genomics Workbench          |
| 66 | EPI_ISL_1634467 | illumina Miseq       | CLC Genomics Workbench          |
| 67 | EPI_ISL_1634470 | illumina Miseq       | CLC Genomics Workbench          |
| 68 | EPI_ISL_1634471 | illumina Miseq       | CLC Genomics Workbench          |
| 69 | EPI_ISL_1634474 | illumina Miseq       | CLC Genomics Workbench          |
| 70 | EPI_ISL_1634475 | illumina Miseq       | CLC Genomics Workbench          |
| 71 | EPI_ISL_1634477 | illumina Miseq       | CLC Genomics Workbench          |
| 72 | EPI_ISL_1660412 | illumina Miseq       | CLC Genomics Workbench          |
| 73 | EPI_ISL_1660413 | illumina Miseq       | CLC Genomics Workbench          |
| 74 | EPI_ISL_1660414 | illumina Miseq       | CLC Genomics Workbench          |
| 75 | EPI_ISL_1660415 | illumina Miseq       | CLC Genomics Workbench          |
| 76 | EPI_ISL_1660416 | Illumina MiSeq       | CLC Genomics Workbench          |
| 77 | EPI_ISL_1660417 | Illumina MiSeq       | CLC Genomics Workbench          |
| 78 | EPI_ISL_1660418 | illumina Miseq       | CLC Genomics Workbench          |
| 79 | EPI_ISL_1660419 | illumina Miseq       | CLC Genomics Workbench          |

|     |                 |                |                        |
|-----|-----------------|----------------|------------------------|
| 80  | EPI_ISL_1660420 | illumina Miseq | CLC Genomics Workbench |
| 81  | EPI_ISL_1660472 | illumina Miseq | CLC Genomics Workbench |
| 82  | EPI_ISL_1660473 | illumina Miseq | CLC Genomics Workbench |
| 83  | EPI_ISL_2709406 | Illumina MiSeq | CLC Genomics Workbench |
| 84  | EPI_ISL_2709407 | Illumina MiSeq | CLC Genomics Workbench |
| 85  | EPI_ISL_2709408 | Illumina MiSeq | CLC Genomics Workbench |
| 86  | EPI_ISL_2709409 | Illumina MiSeq | CLC Genomics Workbench |
| 87  | EPI_ISL_2709410 | Illumina MiSeq | CLC Genomics Workbench |
| 88  | EPI_ISL_2709411 | Illumina MiSeq | CLC Genomics Workbench |
| 89  | EPI_ISL_2709412 | Illumina MiSeq | CLC Genomics Workbench |
| 90  | EPI_ISL_2709413 | Illumina MiSeq | CLC Genomics Workbench |
| 91  | EPI_ISL_2709414 | Illumina MiSeq | CLC Genomics Workbench |
| 92  | EPI_ISL_2709415 | Illumina MiSeq | CLC Genomics Workbench |
| 93  | EPI_ISL_2709418 | Illumina MiSeq | CLC Genomics Workbench |
| 94  | EPI_ISL_2709419 | Illumina MiSeq | CLC Genomics Workbench |
| 95  | EPI_ISL_2709420 | Illumina MiSeq | CLC Genomics Workbench |
| 96  | EPI_ISL_2709421 | Illumina MiSeq | CLC Genomics Workbench |
| 97  | EPI_ISL_2709422 | Illumina MiSeq | CLC Genomics Workbench |
| 98  | EPI_ISL_2709423 | Illumina MiSeq | CLC Genomics Workbench |
| 99  | EPI_ISL_2709424 | Illumina MiSeq | CLC Genomics Workbench |
| 100 | EPI_ISL_2709425 | Illumina MiSeq | CLC Genomics Workbench |
| 101 | EPI_ISL_2709426 | Illumina MiSeq | CLC Genomics Workbench |
| 102 | EPI_ISL_2709427 | Illumina MiSeq | CLC Genomics Workbench |
| 103 | EPI_ISL_2709430 | Illumina MiSeq | CLC Genomics Workbench |
| 104 | EPI_ISL_2709431 | Illumina MiSeq | CLC Genomics Workbench |
| 105 | EPI_ISL_2709433 | Illumina MiSeq | CLC Genomics Workbench |
| 106 | EPI_ISL_2709434 | Illumina MiSeq | CLC Genomics Workbench |
| 107 | EPI_ISL_2709435 | Illumina MiSeq | CLC Genomics Workbench |
| 108 | EPI_ISL_2709436 | Illumina MiSeq | CLC Genomics Workbench |
| 109 | EPI_ISL_2709437 | Illumina MiSeq | CLC Genomics Workbench |
| 110 | EPI_ISL_2709438 | Illumina MiSeq | CLC Genomics Workbench |
| 111 | EPI_ISL_2709439 | Illumina MiSeq | CLC Genomics Workbench |
| 112 | EPI_ISL_2709441 | Illumina MiSeq | CLC Genomics Workbench |
| 113 | EPI_ISL_2709442 | Illumina MiSeq | CLC Genomics Workbench |
| 114 | EPI_ISL_2709443 | Illumina MiSeq | CLC Genomics Workbench |
| 115 | EPI_ISL_2709444 | Illumina MiSeq | CLC Genomics Workbench |
| 116 | EPI_ISL_2709445 | Illumina MiSeq | CLC Genomics Workbench |
| 117 | EPI_ISL_2918627 | Illumina MiSeq | BWA-MEM                |
| 118 | EPI_ISL_2918628 | Illumina MiSeq | BWA-MEM                |
| 119 | EPI_ISL_2918629 | Illumina MiSeq | BWA-MEM                |
| 120 | EPI_ISL_2918630 | Illumina MiSeq | BWA-MEM                |

|     |                 |                      |                                 |
|-----|-----------------|----------------------|---------------------------------|
| 121 | EPI_ISL_2918631 | Illumina MiSeq       | BWA-MEM                         |
| 122 | EPI_ISL_2918632 | Illumina MiSeq       | BWA-MEM                         |
| 123 | EPI_ISL_2918633 | illumina MiSeq       | CLC Genomics Workbench          |
| 124 | EPI_ISL_2918634 | illumina MiSeq       | CLC Genomics Workbench          |
| 125 | EPI_ISL_2918635 | illumina MiSeq       | CLC Genomics Workbench          |
| 126 | EPI_ISL_2918636 | illumina MiSeq       | CLC Genomics Workbench          |
| 127 | EPI_ISL_2918637 | illumina MiSeq       | CLC Genomics Workbench          |
| 128 | EPI_ISL_2918638 | illumina MiSeq       | CLC Genomics Workbench          |
| 129 | EPI_ISL_2918640 | illumina MiSeq       | CLC Genomics Workbench          |
| 130 | EPI_ISL_2918641 | illumina MiSeq       | CLC Genomics Workbench          |
| 131 | EPI_ISL_2918642 | illumina MiSeq       | CLC Genomics Workbench          |
| 132 | EPI_ISL_2918644 | illumina MiSeq       | CLC Genomics Workbench          |
| 133 | EPI_ISL_2918645 | illumina MiSeq       | CLC Genomics Workbench          |
| 134 | EPI_ISL_2918646 | illumina MiSeq       | CLC Genomics Workbench          |
| 135 | EPI_ISL_2918647 | illumina MiSeq       | CLC Genomics Workbench          |
| 136 | EPI_ISL_2918648 | illumina MiSeq       | CLC Genomics Workbench          |
| 137 | EPI_ISL_2918649 | illumina MiSeq       | CLC Genomics Workbench          |
| 138 | EPI_ISL_3030040 | Illumina NextSeq 550 | custom minimap2 + iVar pipeline |
| 139 | EPI_ISL_3030041 | Illumina NextSeq 550 | custom minimap2 + iVar pipeline |
| 140 | EPI_ISL_3030042 | Illumina NextSeq 550 | custom minimap2 + iVar pipeline |
| 141 | EPI_ISL_3030043 | Illumina NextSeq 550 | custom minimap2 + iVar pipeline |
| 142 | EPI_ISL_3030044 | Illumina NextSeq 550 | custom minimap2 + iVar pipeline |
| 143 | EPI_ISL_3030045 | Illumina NextSeq 550 | custom minimap2 + iVar pipeline |
| 144 | EPI_ISL_3030046 | Illumina NextSeq 550 | custom minimap2 + iVar pipeline |
| 145 | EPI_ISL_3030048 | Illumina NextSeq 550 | custom minimap2 + iVar pipeline |
| 146 | EPI_ISL_3030049 | Illumina NextSeq 550 | custom minimap2 + iVar pipeline |
| 147 | EPI_ISL_3030050 | Illumina NextSeq 550 | custom minimap2 + iVar pipeline |
| 148 | EPI_ISL_3030051 | Illumina NextSeq 550 | custom minimap2 + iVar pipeline |
| 149 | EPI_ISL_3030052 | Illumina NextSeq 550 | custom minimap2 + iVar pipeline |
| 150 | EPI_ISL_3030053 | Illumina NextSeq 550 | custom minimap2 + iVar pipeline |
| 151 | EPI_ISL_3030054 | Illumina NextSeq 550 | custom minimap2 + iVar pipeline |
| 152 | EPI_ISL_3030055 | Illumina NextSeq 550 | custom minimap2 + iVar pipeline |
| 153 | EPI_ISL_3030056 | Illumina NextSeq 550 | custom minimap2 + iVar pipeline |
| 154 | EPI_ISL_3030057 | Illumina NextSeq 550 | custom minimap2 + iVar pipeline |
| 155 | EPI_ISL_3030058 | Illumina NextSeq 550 | custom minimap2 + iVar pipeline |
| 156 | EPI_ISL_3030059 | Illumina NextSeq 550 | custom minimap2 + iVar pipeline |
| 157 | EPI_ISL_745033  | Illumina MiSeq       | UGENE v.37                      |
| 158 | EPI_ISL_747235  | Illumina MiSeq       | UGENE v.37                      |
| 159 | EPI_ISL_747236  | Oxford Nanopore      |                                 |
| 160 | EPI_ISL_747238  | Oxford Nanopore      |                                 |
| 161 | EPI_ISL_747239  | Illumina MiSeq       | UGENE v.37                      |

|     |                |                |                                      |
|-----|----------------|----------------|--------------------------------------|
| 162 | EPI_ISL_747240 | Illumina MiSeq | UGENE v.37                           |
| 163 | EPI_ISL_747241 | Illumina MiSeq | Dragen RNA Pathogen Detection 3.5.14 |

**Supplementary Table S2. Hotspot mutations (frequency >10% of samples) found in SARS-CoV-2 genome sequences circulating in Indonesia.** Mutations are sorted in descending frequency order.

| No. | Gene_Mutation | Frequency (%)* | No. | Gene_Mutation | Frequency (%)* |
|-----|---------------|----------------|-----|---------------|----------------|
| 1   | S_D614G       | 100.00         | 21  | S_V1264L      | 39.26          |
| 2   | NSP12_P323L   | 100.00         | 22  | ORF7b_T40I    | 39.26          |
| 3   | S_P681R       | 67.48          | 23  | NSP6_T77A     | 39.26          |
| 4   | ORF3a_Q57H    | 49.08          | 24  | NSP4_V167L    | 39.26          |
| 5   | N_D377Y       | 43.56          | 25  | NSP4_T492I    | 39.26          |
| 6   | S_T478K       | 42.33          | 26  | NSP3_T678I    | 39.26          |
| 7   | S_T19R        | 42.33          | 27  | NSP3_P822L    | 39.26          |
| 8   | S_R158del     | 42.33          | 28  | NSP3_P1469S   | 39.26          |
| 9   | S_L452R       | 42.33          | 29  | NSP3_P1228L   | 39.26          |
| 10  | S_F157del     | 42.33          | 30  | NSP3_A488S    | 39.26          |
| 11  | S_E156G       | 42.33          | 31  | NSP2_P200L    | 39.26          |
| 12  | ORF7a_T120I   | 42.33          | 32  | NSP14_A394V   | 39.26          |
| 13  | ORF3a_S26L    | 42.33          | 33  | N_G215C       | 39.26          |
| 14  | NSP13_P77L    | 42.33          | 34  | S_N439K       | 34.36          |
| 15  | NSP12_G671S   | 42.33          | 35  | NSP3_T350I    | 30.06          |
| 16  | N_R203M       | 42.33          | 36  | N_D63G        | 26.99          |
| 17  | M_I82T        | 42.33          | 37  | NSP3_S126L    | 25.77          |
| 18  | S_D950N       | 41.72          | 38  | NSP13_S259L   | 25.77          |
| 19  | ORF7a_V82A    | 41.72          | 39  | NSP6_L75F     | 20.25          |
| 20  | N_T205I       | 41.72          | 40  | S_G142D       | 11.04          |



**Supplementary Table S3. Analysis of mutations found in dominant variants (B.1.466.2, B.1.470 and B.1.617.2) on protein stability.** Stability change is shown as  $\Delta G_{\text{mutant}} - \Delta G_{\text{wildtype}}$ . ( $\Delta\Delta G > 0.5$  : destabilize;  $\Delta\Delta G < -0.5$  : stabilize;  $-0.5 < \Delta\Delta G < 0.5$  : neutral). Mutations in grey are mutations appearing with a prevalence of higher than 90% in each variant (not appearing in all sequences).

| Variant   | Mutation                       | $\Delta\Delta G$ Protein<br>(kcal/mol) | Result      |
|-----------|--------------------------------|----------------------------------------|-------------|
| B.1.466.2 | S_D614G                        | -0.55                                  | Stabilize   |
|           | S_N439K                        | -0.97                                  | Stabilize   |
|           | S_N439K/D614G                  | -1.52                                  | Stabilize   |
|           | N_T205I                        | 0.02                                   | Neutral     |
|           | NSP3_P822L                     | 0.14                                   | Neutral     |
|           | NSP12_P323L                    | 0.86                                   | Destabilize |
|           | ORF3a_Q57H                     | 0.55                                   | Destabilize |
| B.1.470   | S_D614G                        | -0.55                                  | Stabilize   |
|           | NSP12_P227L                    | 1.25                                   | Destabilize |
|           | NSP12_P323L                    | 0.86                                   | Destabilize |
|           | NSP12_P227L/P323L              | 2.01                                   | Destabilize |
|           | ORF3a_Q57H                     | 0.55                                   | Destabilize |
| B.1.617.2 | S_T19R                         | -0.77                                  | Stabilize   |
|           | S_E156G                        | 3.04                                   | Destabilize |
|           | S_L452R                        | 0.98                                   | Destabilize |
|           | S_T478K                        | -0.56                                  | Stabilize   |
|           | S_D614G                        | -0.55                                  | Stabilize   |
|           | S_T19R/E156G/L452R/T478K/D614G | 1.77                                   | Destabilize |
|           | N_R203M                        | 0.32                                   | Neutral     |
|           | N_D377Y                        | -1.39                                  | Stabilize   |
|           | N_R203M/D377Y                  | -1.02                                  | Stabilize   |
|           | M_I82T                         | 0.56                                   | Destabilize |
|           | NSP3_T678I                     | 2.65                                   | Destabilize |
|           | NSP3_P1469S                    | 4.98                                   | Destabilize |
|           | NSP3_P1228L                    | 1.48                                   | Destabilize |
|           | NSP3_A488S                     | -0.06                                  | Neutral     |
|           | NSP3_T678I/P1469S/P1228L/A488S | 9.15                                   | Destabilize |
|           | NSP12_P323L                    | 0.86                                   | Destabilize |
|           | NSP12_G671S                    | 1.01                                   | Destabilize |
|           | NSP12_P323L/G671S              | 1.86                                   | Destabilize |
|           | NSP13_P77L                     | 1.85                                   | Destabilize |
|           | ORF3a_S26L                     | 0.7                                    | Destabilize |
|           | ORF7a_T120I                    | 0.38                                   | Neutral     |

**Supplementary Table S4. Molecular docking analysis of spike protein (wildtype, B.1.466.2, B.1.470 and B.1.617.2 variant) with ACE2 receptor.**

| Protein Variant | Docking Score (a.u) | Binding Affinity (kcal/mol) |
|-----------------|---------------------|-----------------------------|
| S_wild type     | -112.4              | -10.0                       |
| S_B.1.466.2     | -106.5              | -10.1                       |
| S_B.1.470       | -110.4              | -10.6                       |
| S_B.1.617.2     | -109.5              | -12.2                       |
